# Supplementary material for: Vapor adsorption experiments as a characterization tool for layered catalysts
Source: Royal Society of Chemistry journal article supplement (doi:10.1039/d0nj00389a), 2020-01-01
Supplement: d0nj00389a1.pdf [file d0nj00389a1.pdf]

## Supplementary Information

### Vapor adsorption experiments as a characterization tool for layered catalysts

Guilherme P. Campos<sup>a</sup>, Gabriel B. Báfero<sup>a</sup>, Heloise O. Pastore<sup>\*a</sup>

<sup>a</sup> Institute of Chemistry, University of Campinas, Monteiro Lobato St. 270, 13084-971, Campinas, Sao Paulo, Brazil.

Corresponding e-mail: gpmmm@unicamp.br

#### 1. Scanning electron micrography of Na-[Al]-magadiite and Na-[Al]-RUB-18.

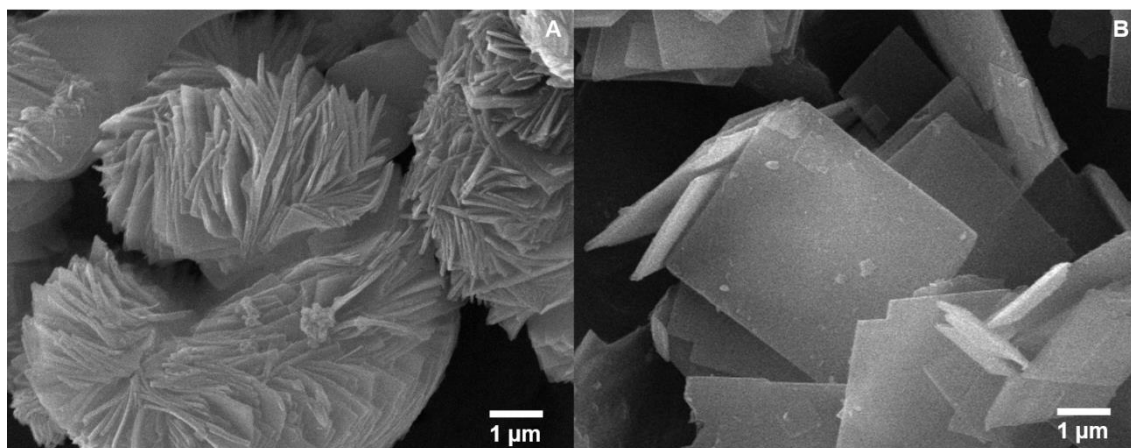

**Fig. S1.** Scanning electron micrography of Na-[Al]-magadiite (A) and Na-[Al]-RUB-18 (B) samples.

## 2. X ray diffraction of sodium and protonic magadiite and RUB-18.

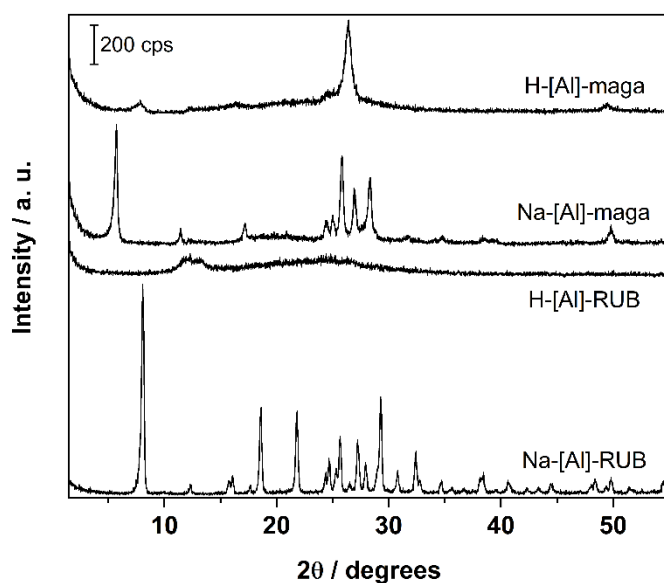

**Fig. S2.** X ray diffraction of the synthesized materials (Na-[Al]-maga and Na-[Al]-RUB) and after ammonia thermodecomposition (H-[Al]-maga and H-[Al]-RUB).

## 3. Fourier Transform Infrared (FTIR) of protonic magadiite and RUB-18.

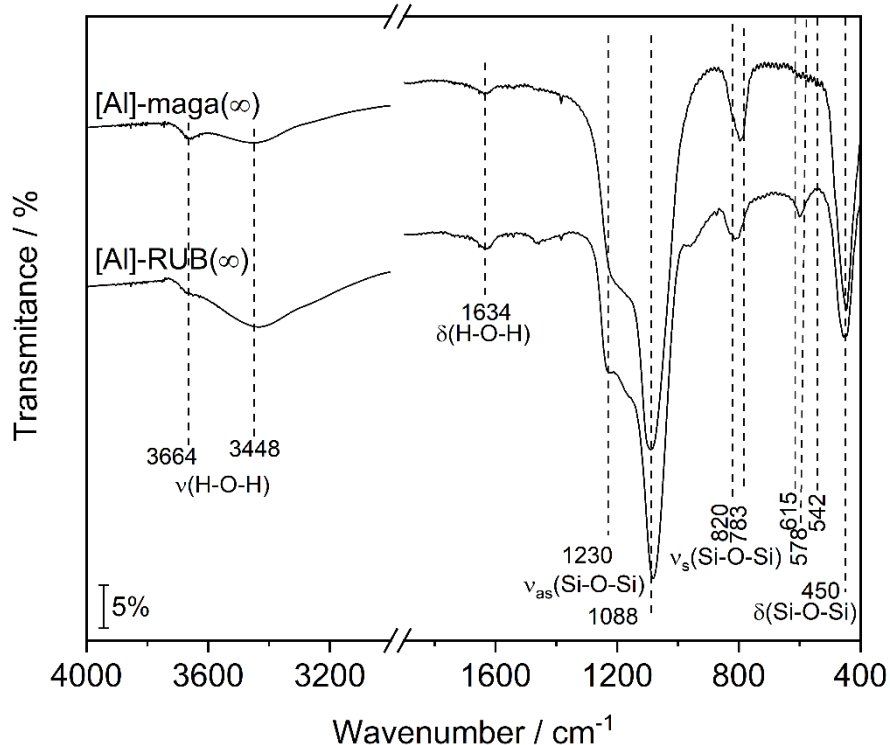

**Fig. S3.** Examples of FTIR spectrum of protonic materials after the thermodecomposition of ammonia.

**Table S1.** Assignment of FTIR bands of the layered materials<sup>1</sup>

| Wavenumber<br>[cm <sup>-1</sup> ] | Assignment                        | Observation                                                          |
|-----------------------------------|-----------------------------------|----------------------------------------------------------------------|
| 3664; 3448                        | $\nu(\text{H-O-H})$               | water molecules and/or silanols groups                               |
| 1634                              | $\delta(\text{H-O-H})$            | water molecules vibration                                            |
| 1230; 1088                        | $\nu_{\text{as}}(\text{Si-O-Si})$ | internal vibration of 5 member rings present in the solids structure |
| 820; 783                          | $\nu_{\text{s}}(\text{Si-O-Si})$  | vibrations of TO4 groups in the structure                            |
| 615; 578                          |                                   | double ring vibration present in the solids structure                |
| 450; 443                          | $\delta(\text{Si-O-Si})$          | deformation of Si-O-Si groups                                        |

1: Y. Huang, Z. Jiang, W. Schwieger, *Chemistry of materials*, 1999, **11**, 1210-1217.

#### 4. Surface and porosity characterization of [Al]-magadiites and [Al]-RUB

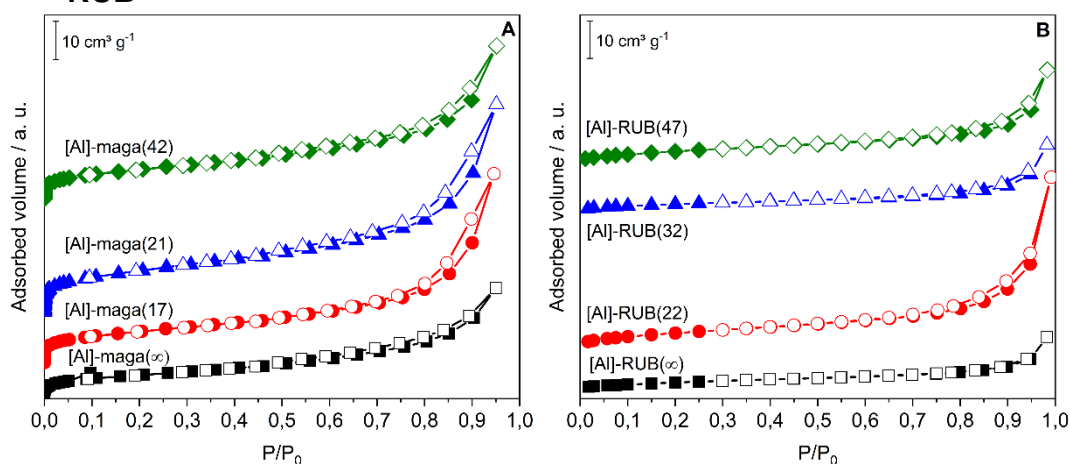

**Fig. S4.** Physisorption of N<sub>2</sub> in H-[Al]-magadiites (A) and Ar in H-[Al]-RUB-18 samples (B).

**Table S2.** Surface area and total pore volume data obtained by N<sub>2</sub> and Ar physisorption

| Protonic solid | Si/Al | A <sub>BET</sub> / m <sup>2</sup> g <sup>-1</sup> | Total por volume / cm <sup>3</sup> g <sup>-1</sup> |
|----------------|-------|---------------------------------------------------|----------------------------------------------------|
| [Al]-maga      | ∞     | 21.8                                              | 0.04                                               |
|                | 17    | 24.7                                              | 0.08                                               |
|                | 21    | 40.9                                              | 0.09                                               |
|                | 42    | 29.4                                              | 0.06                                               |
| [Al]-RUB       | ∞     | 6.7                                               | 0.02                                               |
|                | 22    | 12.5                                              | 0.06                                               |
|                | 32    | 7.3                                               | 0.02                                               |
|                | 47    | 10.6                                              | 0.03                                               |

## 5. Solid state nuclear magnetic resonance of $^{27}\text{Al}$ nuclei

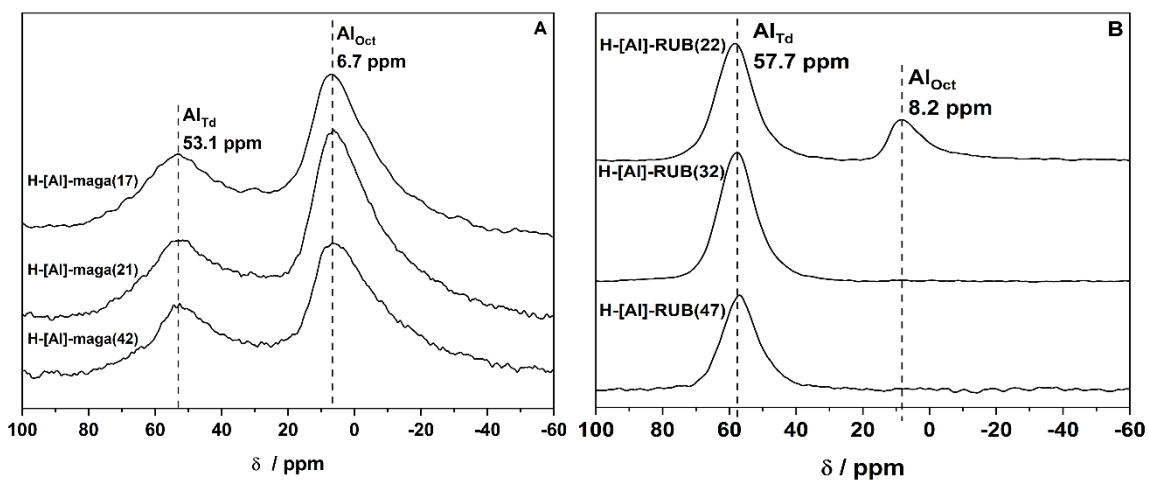

**Fig. S5.** Solid state NMR of  $^{27}\text{Al}$  nuclei of (A) for H-[Al]-magadiite samples and (B) H-[Al]-RUB samples.

**Table S3.** Ethanol adsorption and materials data.

| Sample              | $V_{\text{ads}}$<br>[cm <sup>3</sup> g <sup>-1</sup> ] | $n_{\text{et}}$<br>[mol EtOH/g] | Al <sub>Td</sub> | Al <sub>Oct</sub> | $n_{\text{Al}}$<br>[moles of Al/g] | $V_{\text{ads}}/n_{\text{Al}}$<br>[L of EtOH/moles<br>of Al] | $n_{\text{et}}/n_{\text{Al}}$<br>[moles of EtOH/moles of Al] |
|---------------------|--------------------------------------------------------|---------------------------------|------------------|-------------------|------------------------------------|--------------------------------------------------------------|--------------------------------------------------------------|
| Na-maga( $\infty$ ) | 2.5                                                    | 4.3E-2                          | -                | -                 | -                                  | -                                                            | -                                                            |
| Na-[Al]-maga(17)    | 3.3                                                    | 5.6E-2                          | -                | -                 | 8.7E-04                            | 3.8                                                          | 64.7                                                         |
| Na-[Al]-maga(21)    | 3.3                                                    | 5.6E-2                          | -                | -                 | 7.1E-04                            | 4.7                                                          | 79.0                                                         |
| Na-[Al]-maga(42)    | 2.8                                                    | 4.8E-2                          | -                | -                 | 3.7E-04                            | 7.7                                                          | 131.5                                                        |
| H-maga( $\infty$ )  | 6.4                                                    | 1.1E-1                          | -                | -                 | -                                  | -                                                            | -                                                            |
| H-[Al]-maga(17)     | 3.9                                                    | 6.8E-2                          | 28%              | 72%               | 8.7E-04                            | 4.5                                                          | 78.6                                                         |
| H-[Al]-maga(21)     | 5.7                                                    | 9.8E-2                          | 31%              | 69%               | 7.1E-04                            | 8.0                                                          | 138.2                                                        |
| H-[Al]-maga(42)     | 6.1                                                    | 1.0E-1                          | 36%              | 64%               | 3.7E-04                            | 16.7                                                         | 274.0                                                        |
| H-RUB( $\infty$ )   | 0.7                                                    | 1.2E-2                          | -                | -                 | -                                  | -                                                            | -                                                            |
| H-[Al]-RUB(22)      | 4.0                                                    | 6.9E-2                          | 76%              | 24%               | 4.5E-04                            | 9.0                                                          | 154.7                                                        |
| H-[Al]-RUB(32)      | 4.7                                                    | 8.1E-2                          | 100%             | -                 | 4.3E-04                            | 10.9                                                         | 187.5                                                        |
| H-[Al]-RUB(47)      | 5.0                                                    | 8.7E-2                          | 100%             | -                 | 3.0E-04                            | 16.7                                                         | 291.0                                                        |

$n_{\text{et}}$ : moles of ethanol adsorbed per gram of material.

$n_{\text{Al}}$ : moles of aluminum per gram of material determined by X ray fluorescence.

$V_{\text{ads}}/n_{\text{Al}}$ : volume adsorbed of ethanol adsorbed per moles of aluminum.

$n_{\text{et}}/n_{\text{Al}}$ : moles of ethanol per moles of aluminum.

**Table S4.** Pentane adsorption and materials data.

| Sample                 | $V_{ads}$<br>[cm <sup>3</sup> g <sup>-1</sup> ] | $n_p$<br>[mol<br>pentane/g] | Al <sub>Td</sub> | Al <sub>Oct</sub> | $n_{Al}$<br>[moles of pentane/g] | $V_{ads}/n_{Al}$<br>[L of<br>pentane/moles<br>of Al] | $n_p/n_{Al}$<br>[moles of /moles of Al] |
|------------------------|-------------------------------------------------|-----------------------------|------------------|-------------------|----------------------------------|------------------------------------------------------|-----------------------------------------|
| H-maga( $\infty$ )     | 3.0                                             | 2.6E-2                      | -                | -                 | -                                | -                                                    | -                                       |
| H-[Al]-maga(42)        | 3.9                                             | 3.4E-2                      | 36%              | 64%               | 3.7E-04                          | 10.7                                                 | 93.2                                    |
| H-[Al]-RUB( $\infty$ ) | 1.0                                             | 8.9E-3                      | -                | -                 | -                                | -                                                    | -                                       |
| H-[Al]-RUB(47)         | 5.1                                             | 4.4E-2                      | 100%             |                   | 3.0E-04                          | 17.1                                                 | 148.7                                   |

$n_p$ : moles of pentane adsorbed per gram of material.

$n_{Al}$ : moles of aluminum per gram of material determined by X ray fluorescence.

$V_{ads}/n_{Al}$ : volume adsorbed of pentane adsorbed per moles of aluminum.

$n_p/n_{Al}$ : moles of pentane per moles of aluminum.
